# Supplementary material for: Stabilization of V1 interneuron-motor neuron connectivity ameliorates motor phenotype in a mouse model of ALS
Source: PubMed Central journal article supplement (PMC11161600; doi:10.1038/s41467-024-48925-7), 2024-06-07
Supplement: 41467_2024_48925_MOESM1_ESM.pdf [file 41467_2024_48925_MOESM1_ESM.pdf]

1 **Supplementary Information**

2

3 **Stabilization of V1 interneuron-motor neuron connectivity ameliorates motor phenotype in**  
4 **a mouse model of ALS**

5

6 *Santiago Mora<sup>1</sup>, Anna Stuckert<sup>1-2\*</sup>, Rasmus von Huth Friis<sup>1\*</sup>, Kimberly Pietersz<sup>3</sup>, Gith Noes-*  
7 *Holt<sup>1</sup>, Roser Montañana-Rosell<sup>1</sup>, Haoyu Wang<sup>2</sup>, Andreas Toft Sørensen<sup>1</sup>, Raghavendra*  
8 *Selvan<sup>4</sup>, Joost Verhaagen<sup>3</sup>, Ilary Allodi<sup>1-2+</sup>*

9

10 **Including:**

11

12 Supplementary Figure 1-4

13 Supplementary Table 1

14

15

16

17

18

19

20

21

22

23

24

25

26

27

28

29

30

31

32

33

34

35

36

37

38

39

40

41

42 **Supplementary figures:**

43

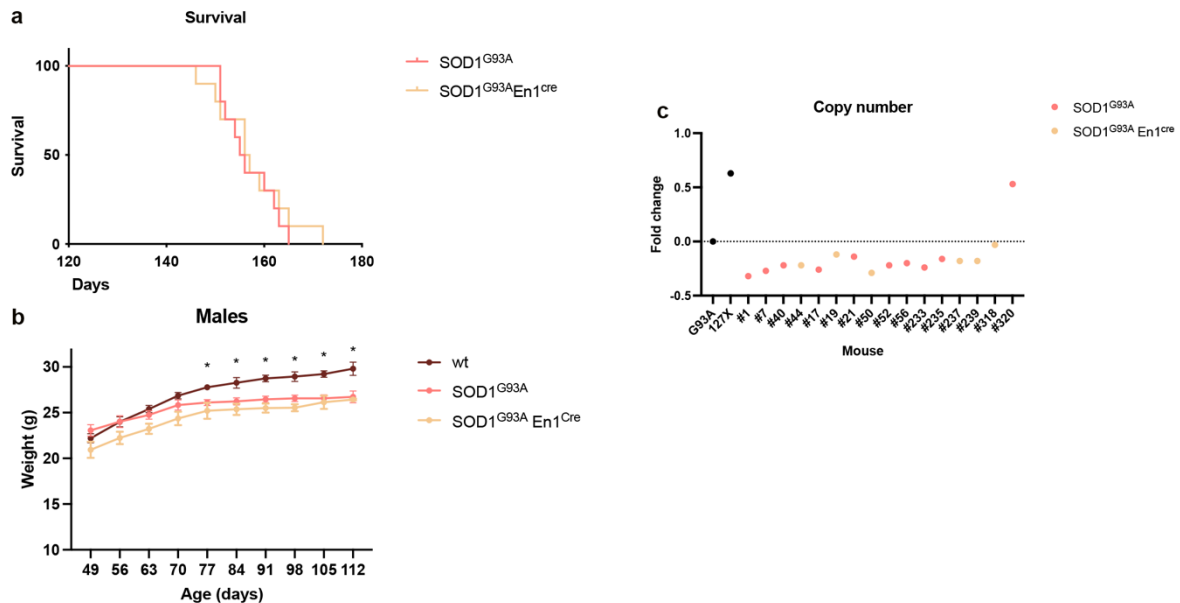

44

45 **Supplementary figure 1.** a) Kaplan Meyer survival curve comparing SOD1<sup>G93A</sup>;En1<sup>cre</sup> to  
 46 SOD1<sup>G93A</sup> strain survival upon crossing. No significant differences were observed between the  
 47 two strains (Log-rank (Mantel-Cox) test, P=0.5926, df=1, Chi square=0.2863; SOD1<sup>G93A</sup>;En1<sup>cre</sup>  
 48 N=10 mice, SOD1<sup>G93A</sup> N=10 mice). Thus, disease progression is comparable between the two  
 49 strains included in the study. b) Comparison of loss of weight of SOD1<sup>G93A</sup>, SOD1<sup>G93A</sup>;En1<sup>cre</sup>  
 50 and WT male mice in the strains included in the study. After crossing, SOD1<sup>G93A</sup>;En1<sup>cre</sup> do not  
 51 differ from SOD1<sup>G93A</sup> mice but both strains decrease in weight compared to WT littermates  
 52 (two-way ANOVA and Dunnett's post hoc, F(18,110)=1.704, P=0.0489, P77 SOD1<sup>G93A</sup>  
 53 P=0.0307, SOD1<sup>G93A</sup>;En1<sup>cre</sup> P=0.0046, WT N=5 mice, SOD1<sup>G93A</sup> N=6 mice, SOD1<sup>G93A</sup>;En1<sup>cre</sup> N=3  
 54 mice). Thus, weight loss is comparable in both SOD1<sup>G93A</sup> and SOD1<sup>G93A</sup>;En1<sup>cre</sup> mice. c) Copy  
 55 number of human SOD1 mutations carried by experimental mice. SOD1<sup>G93A</sup> fold change in  
 56 pink, SOD1<sup>G93A</sup>;En1<sup>cre</sup> in beige. First black dot depicts positive control - SOD1<sup>G93A</sup> founder  
 57 carrying 25 copies of the mutated gene, second black dot depicts negative control – SOD1<sup>127X</sup>  
 58 carrying 19 copies of the mutated gene. All graphs show mean values ± SEM.

59

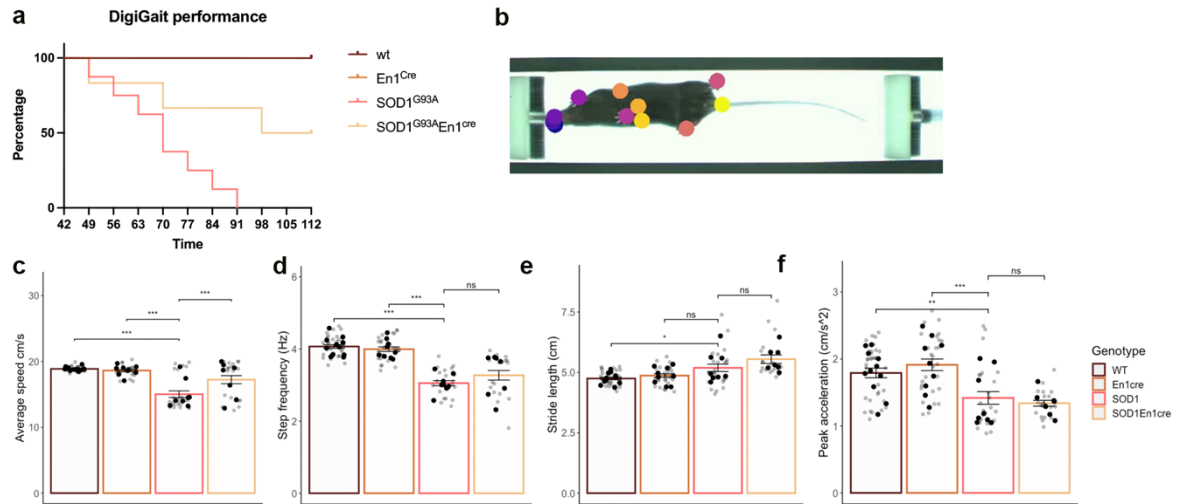

60

61 **Supplementary figure 2.** a) Performance of all mice included in the study on a treadmill at a  
 62 speed of 20 cm/s. Percentage shows that between P49 and P63 37.5% of SOD1<sup>G93A</sup> mice fail  
 63 at the task, while only the 16.7% of the SOD1<sup>G93A</sup>;En1<sup>cre</sup> cannot cope with the speed (SOD1<sup>G93A</sup>  
 64 median=70, SOD1<sup>G93A</sup>;En1<sup>cre</sup> median=105, Log-rank (Mantel-Cox) test df=3, P<0.0001, Chi  
 65 square=29.02, WT N=11 and SOD1<sup>G93A</sup> N=8 mice, En1cre N=9, SOD1<sup>G93A</sup>;En1<sup>cre</sup> N=7). b)  
 66 Example of ventral view tracking of mice on the treadmill, 11 markers were used. c)  
 67 Differences in average speed (One-way ANOVA and Dunnett's post hoc, P = 2e-04) at onset  
 68 of locomotor phenotype showing that SOD1<sup>G93A</sup>;En1<sup>cre</sup> have a later onset when compared to  
 69 SOD1<sup>G93A</sup> mice (WT N=11 and SOD1<sup>G93A</sup> N=8 mice, En1cre N=9, SOD1<sup>G93A</sup>;En1<sup>cre</sup> N=7). d) Step  
 70 frequency, stride length e) and peak acceleration f) remain unchanged at this timepoint. All  
 71 graphs show mean values ± SEM, averages values in c-f are shown in black, technical  
 72 triplicates are shown in gray.

73

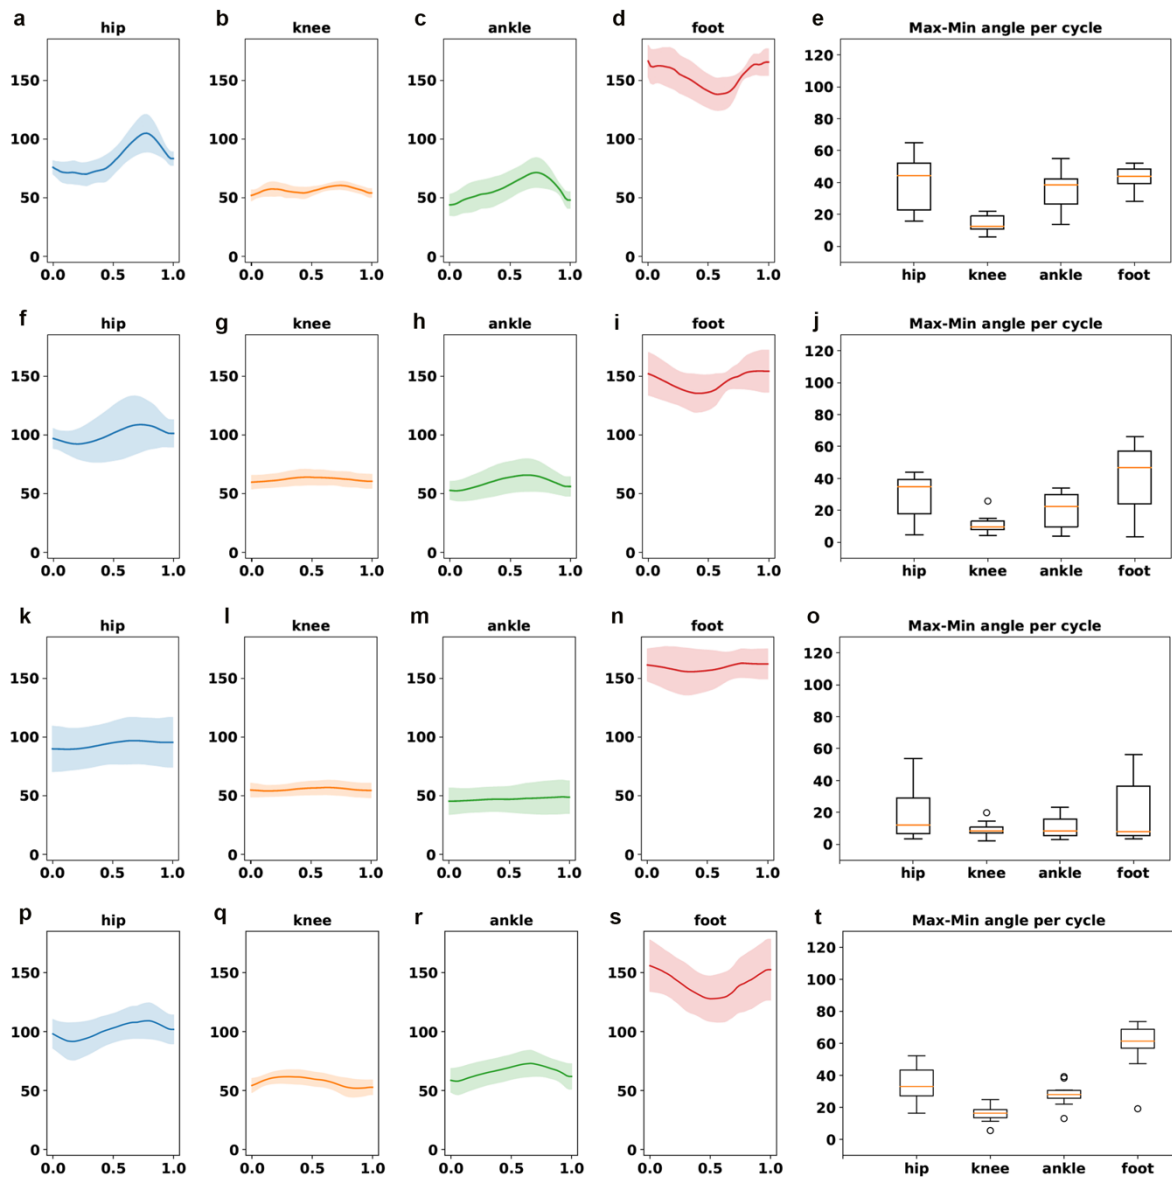

74

75 **Supplementary figure 3.** Example of changes in angle amplitudes within one step cycle in WT  
 76 (a-e),  $En1^{cre}$  (f-j),  $SOD1^{G93A}$  (k-o) and  $SOD1^{G93A};En1^{cre}$  (p-t) mice. 15 independent steps within  
 77 each video are utilized for visualization of Max-Min variability (e; j; o; t). Hip k), knee l), ankle  
 78 m) and foot n) angles are reduced in the  $SOD1^{G93A}$  mice at P112 timepoint, indicative of  
 79 hyperflexion which is exacerbated by disease progression. Changes in amplitude are observed  
 80 in  $SOD1^{G93A};En1^{cre}$  mice overexpressing hEysyt1 (p-t).

81

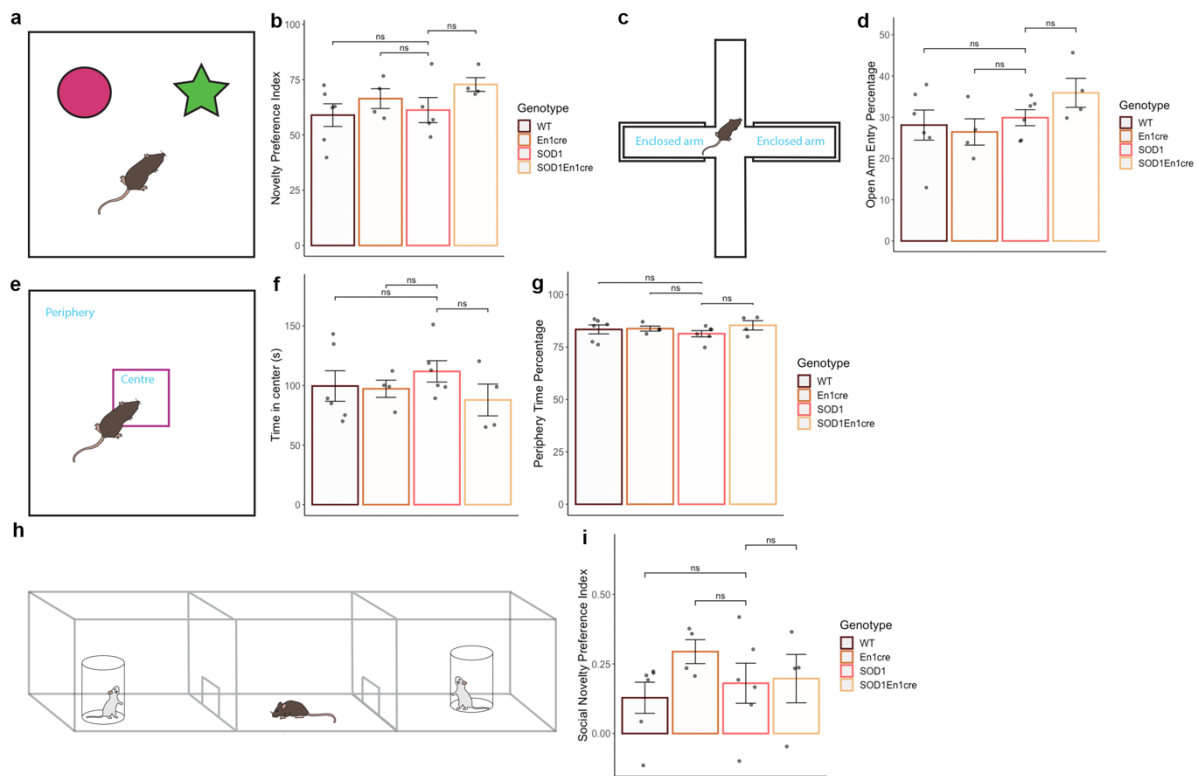

82  
83 **Supplementary figure 4.** Cognitive assessment of WT, En1<sup>cre</sup>, SOD1<sup>G93A</sup> and SOD<sup>G93A</sup>En1<sup>cre</sup>  
84 mice after systemic administration of viral vectors. General activity and exploration, memory,  
85 anxiety, and social behavior were investigated. a) Schematic of the novel object recognition  
86 (NOR) paradigm. b) NOR revealed no significant differences in the time spent interacting with  
87 the novel object out of the total time interacting with the objects (Novelty Preference Index)  
88 (One way ANOVA and Dunnett's post hoc: WT P = 0.9736, En1<sup>cre</sup> P = 0.8236 SOD1<sup>G93A</sup>;En1<sup>cre</sup> P  
89 = 0.3020, N = 4-6). c) Schematic of the elevated plus maze paradigm (EPM). d) SOD1<sup>G93A</sup>En1<sup>cre</sup>  
90 mice overexpressing hEsyt1 exhibit a higher interest in the open arms of the EPM, however  
91 no significant difference is observed for the number of entries in open arms over total arm  
92 entries (One way ANOVA and Dunnett's post hoc: WT P = 0.9490, En1<sup>cre</sup> P = 0.7980,  
93 SOD1<sup>G93A</sup>;En1<sup>cre</sup> P = 0.4357, N = 4-6). e) Schematic depicting the open field test (OFT), the  
94 purple square divides the central area from the periphery. f-g) OFT revealed no significant  
95 differences in f) time spent in center (One way ANOVA and Dunnett's post hoc: WT P = 0.7487,  
96 En1<sup>cre</sup> P = 0.7147, SOD1<sup>G93A</sup>;En1<sup>cre</sup> P = 0.3574, N = 4-6) and g) time spent in the periphery out  
97 of total time (Periphery Preference) (One way ANOVA and Dunnett's post hoc: WT P = 0.7487,  
98 En1<sup>cre</sup> P = 0.7153, SOD1<sup>G93A</sup>;En1<sup>cre</sup> P = 0.3579, N = 4-6). h) Cartoon depicting experimental  
99 paradigm for the three-chamber test (3CT). No significant differences were observed in i)  
100 preference for social novelty over familiar social interaction (Social Novelty Preference Index)  
101 (One way ANOVA and Dunnett's post hoc: WT P = 0.8857, En1<sup>cre</sup> P = 0.5389, SOD1<sup>G93A</sup>;En1<sup>cre</sup>  
102 P = 0.9967, N = 4-6). Graphs show mean values ± SEM. One-way ANOVA followed by Dunnett's  
103 post-hoc test with SOD1<sup>G93A</sup> as control group, N = 4-6 as indicated by individual values.

104  
105

106 **Supplementary table 1.** Parameters of QuPath software for RNAscope analysis.

107

## 108 **1.1. Endogenous Esyt1**

109

### **ANALYZE > CELL DETECTION**

#### **Setup parameters**

|                      |                   |
|----------------------|-------------------|
| Detection channel    | <i>DAPI-T2</i>    |
| Requested pixel size | 0.5 $\mu\text{m}$ |

#### **Nucleus parameters**

|                      |                     |
|----------------------|---------------------|
| Background radius    | 10 $\mu\text{m}$    |
| Median filter radius | 1 $\mu\text{m}$     |
| Sigma                | 2 $\mu\text{m}$     |
| Minimum area         | 10 $\mu\text{m}^2$  |
| Maximum area         | 600 $\mu\text{m}^2$ |

#### **Intensity parameters**

|                |     |                                |
|----------------|-----|--------------------------------|
| Threshold      | 1   | Start with 1, change as needed |
| Split by shape | YES |                                |

#### **Cell parameters**

|                      |                  |
|----------------------|------------------|
| Cell expansion       | 10 $\mu\text{m}$ |
| Include cell nucleus | NO               |

#### **General parameters**

|                   |     |
|-------------------|-----|
| Smooth boundaries | YES |
| Make measurements | YES |

### **ANALYZE > CELL DETECTION > POSITIVE CELL DETECTION**

#### **Intensity threshold parameters**

|                   |                         |                                |
|-------------------|-------------------------|--------------------------------|
| Score compartment | <i>Cell: Cy3-T1 max</i> |                                |
| Threshold 1+      | 5                       | Start with 5, change as needed |
| Threshold 2+      | -                       |                                |
| Threshold 3+      | -                       |                                |
| Single threshold  | YES                     |                                |

110

## 111 **1.2. Viral Esyt1 overexpression**

112

### **ANALYZE > CELL DETECTION**

#### **Setup parameters**

|                      |                                 |
|----------------------|---------------------------------|
| Detection channel    | <i>NeuroTrace</i><br><i>-T2</i> |
| Requested pixel size | 0.5 $\mu\text{m}$               |

#### **Nucleus parameters**

|                   |                  |
|-------------------|------------------|
| Background radius | 10 $\mu\text{m}$ |
|-------------------|------------------|

|                             |                     |                                  |
|-----------------------------|---------------------|----------------------------------|
| Median filter radius        | 1 $\mu\text{m}$     |                                  |
| Sigma                       | 5-6 $\mu\text{m}$   | Change as needed                 |
| Minimum area                | 25 $\mu\text{m}^2$  |                                  |
| Maximum area                | 800 $\mu\text{m}^2$ |                                  |
| <b>Intensity parameters</b> |                     |                                  |
| Threshold                   | 200-400             | Start with 200, change as needed |
| Split by shape              | YES                 |                                  |
| <b>Cell parameters</b>      |                     |                                  |
| Cell expansion              | 2 $\mu\text{m}$     |                                  |
| Include cell nucleus        | NO                  |                                  |
| <b>General parameters</b>   |                     |                                  |
| Smooth boundaries           | YES                 |                                  |
| Make measurements           | YES                 |                                  |
