# Supplementary material for: Stabilization of V1 interneuron-motor neuron connectivity ameliorates motor phenotype in a mouse model of ALS
Source: PubMed Central journal article supplement (PMC11161600; doi:10.1038/s41467-024-48925-7), 2024-06-07
Supplement: 41467_2024_48925_MOESM3_ESM.pdf [file 41467_2024_48925_MOESM3_ESM.pdf]

## Description of Additional Supplementary Files

### File Name: Supplementary Movie 1

**Description:** Kinematic analysis of a SOD1<sup>G93A</sup> mouse at P112 at a speed of 10 cm/s (average phenotype of SOD1<sup>G93A</sup> mice at this timepoint). Video was recorded at 150 frames/s, and it is shown at 30 frames/s.

### File Name: Supplementary Movie 2

**Description:** Kinematic analysis of a SOD1<sup>G93A</sup>;En1<sup>cre</sup> mouse at P112 at a speed of 15 cm/s (average phenotype of SOD1<sup>G93A</sup>;En1<sup>cre</sup> mice at this timepoint), showing differences in hindlimb hyperflexion and in the angle of the mouse body from the belt. Video was recorded at 150 frames/s, and it is shown at 30 frames/s.
